# Supplementary material
Source: HighWire-hosted journal article supplement (http://www.qdcxjkg.com/highwire/filestream/113441/field_highwire_adjunct_files/0/Supplement_file_ERJ-02099-2011.pdf)
Supplement: Supplement_file_ERJ-02099-2011.pdf [file Supplement_file_ERJ-02099-2011.pdf]

Supplement Table S1: List of mammalian MMPs and their major substrates

| Enzyme                                    | MMP Number | Extracellular Matrix Substrates                                                                                                                                                                                                                                                                                                                                                                                                                                 | Non-Matrix Substrates                                                                                                                                                                                                                                                                                                                                                                                                                                                                                                                                                     | Cellular Sources of MMPs(Vasculature)                                                                           |
|-------------------------------------------|------------|-----------------------------------------------------------------------------------------------------------------------------------------------------------------------------------------------------------------------------------------------------------------------------------------------------------------------------------------------------------------------------------------------------------------------------------------------------------------|---------------------------------------------------------------------------------------------------------------------------------------------------------------------------------------------------------------------------------------------------------------------------------------------------------------------------------------------------------------------------------------------------------------------------------------------------------------------------------------------------------------------------------------------------------------------------|-----------------------------------------------------------------------------------------------------------------|
| <b>Collagenases</b>                       |            |                                                                                                                                                                                                                                                                                                                                                                                                                                                                 |                                                                                                                                                                                                                                                                                                                                                                                                                                                                                                                                                                           |                                                                                                                 |
| Collagenase 1 or Interstitial Collagenase | MMP-1      | Native collagens (Type II>I>II, VII, VIII, X, and XI), Denatured Collagens (Gelatin), Elastin, Fibronectin, Laminin-5, Aggrecan, Brevican Neurocan, BM-40, Decorin, Vitronectin, Entactin/ Nidogen, Tenascin, Perlecan, Connective Tissue Growth Factor (CTGF), Link protein, Myelin basic protein, Fibrin, Fibrinogen                                                                                                                                          | Pro-MMP-1, Pro-MMP-2, proMMP-9, MCP (Monocyte Chemoattractant Protein)-1, MCP-3, MCP-4, Stromal Cell Derived Factor (SDF), Pro-1L-1 $\beta$ , 1L-1 $\beta$ , IL-8, IGFBP-2, IGFBP-3, Pro-TNF- $\alpha$ , CXCL5, CXCL11 precursor, Casein, C1q, Serum amyloid A protein, $\alpha_1$ -Proteinase Inhibitor, $\alpha_1$ -Anti-Chymotrypsin, $\alpha_2$ -Macroglobulin                                                                                                                                                                                                        | VECs and Macrophages [1] [2], SMCs [3] and Lymphocytes [1], Fibroblasts [4]                                     |
| Collagenase 2 or Neutrophil Collagenase   | MMP-8      | Native collagens (Type I>II>III, VII, and X), Gelatin, Fibronectin, Laminin Subunit Gamma-2, Entactin, Aggrecan, Tenascin, Brevican Core Protein Precursor, Myelin Basic Protein, Fibrinogen                                                                                                                                                                                                                                                                    | Pro-MMP-8, MCP-1, Pro-TNF- $\alpha$ , IL-8, L-Selectin, IGFBP, CXCL5, CXCL10, CXCL11, Substance P, Angiotensin I, Angiotensin II, Bradykinin, Ephrin-B1, Plasmin C1-Inhibitor, $\alpha_1$ -Proteinase Inhibitor, $\alpha_2$ -Macroglobulin                                                                                                                                                                                                                                                                                                                                | VECs [5], VSMCs, Neutrophils and Macrophages [6], T-cells                                                       |
| Collagenase 3                             | MMP-13     | Native collagens (Type II>III>I, VI, VII, IX, X, and XIV), Gelatin, Fibronectin, Laminin Subunit Gamma-2, Collagen telopeptides, SDF, Brevican, Fibrillin, Aggrecan, Perlecan, CTGF, Large Tenascin-C, Osteonectin, SPARC, Biglycan, Fibrinogen                                                                                                                                                                                                                 | Pro-MMP-9, Pro-MMP-13, MCP-3, SDF, Pro-TNF- $\alpha$ , CXCL5, Factor XII, Casein, C1q, $\alpha_1$ -Anti-Chymotrypsin, $\alpha_2$ -Macroglobulin                                                                                                                                                                                                                                                                                                                                                                                                                           | VECs and Fibroblasts [7] [8], SMCs, Macrophages [9]                                                             |
| Collagenase 4                             | MMP-18     | Native collagens (Type I, II, III), Gelatin, $\alpha_1$ -peptidase inhibitor                                                                                                                                                                                                                                                                                                                                                                                    |                                                                                                                                                                                                                                                                                                                                                                                                                                                                                                                                                                           |                                                                                                                 |
| <b>Gelatinases</b>                        |            |                                                                                                                                                                                                                                                                                                                                                                                                                                                                 |                                                                                                                                                                                                                                                                                                                                                                                                                                                                                                                                                                           |                                                                                                                 |
| Gelatinase A or 72-KDa Gelatinase         | MMP-2      | Native collagens (Type I, II, III, IV, V, VII, X, and XI), Gelatin, Elastin, Fibronectin, Entactin/Nidogen-1, Aggrecan, Decorin, Fibrillin, Fibulin 2, Laminin-5, Tenascin, SPARC, Vitronectin, Galectin-1, Galectin-3, Versican, BM-40, Brevican, Neurocan, CTGF, Chondroitin Sulfate Proteoglycan (CSPG)-4, Dystroglycan, <i>Procollagen C-proteinase enhancer-1 (PCPE-1)</i> , Link Protein, Osteonectin, Myelin Basic Protein, Biglycan, Fibrin, Fibrinogen | Pro-MMP-1, Pro-MMP-2, Pro-MMP-13, MMP-12, MCP-3, SDF, Pro-TGF- $\beta$ 1, Pro-TNF- $\alpha$ , Pro-IL-1 $\beta$ , CXCL5, IGFBP-3, IGFBP-4, IGFBP-5, IGFBP-6, 14-3-3 protein, Big endothelin-1, Cystatin C, Follistatin-like 1, Alpha-actin-2, Pregnancy zone protein, Substance P, Decorin, IGFBP, Plasminogen receptor S100A10 (p11), proEMAP/p43, FGF-R1 (fibroblast growth factor receptor 1), Macrophage Migration Inhibitory Factor (MMIF), Thrombospondin-2, Plasminogen, $\alpha_1$ -Proteinase Inhibitor, $\alpha_1$ -Anti-Chymotrypsin, $\alpha_2$ -Macroglobulin | ECs [4] [5], PAECs, PASCs [10] [1], SMCs and Lymphocytes [1], Macrophages [11], Neutrophils, T-lymphocytes [12] |
| Gelatinase B or 92-KDa Gelatinase         | MMP-9      | Native collagens (Type I, IV, V, XI, and XIV), Gelatin, Elastin, Vitronectin, Laminin, Decorin, Fibrillin, Fibronectin, SPARC, Aggrecan, Link Protein, Galectin-1, Galectin-3, Versican, Decorin, Biglycan, Link Protein, Osteonectin, Myelin Basic Protein, Fibrin, Fibrinogen                                                                                                                                                                                 | Pro-MMP-2, Pro-MMP-9, Pro-MMP-13, MCP-3, SDF, Pro-IL-8, Pro-TNF- $\alpha$ , Pro-TGF- $\beta$ 2, Pro-IL-1 $\beta$ , Cell-surface IL-2R $\alpha$ , CXCL5, CXCL9, CXCL10, CXCL11, FGF-R1, CTAP-III/NAP-2, GRO $\alpha$ , PF-4, Integrin beta-2, IGFBP-1, IGFBP-4, Substance P, Angiotensin I, Angiotensin II, release of VEGF (substrate not known), ADAMTS-4, SERPINE2, Casein, C1q, Tissue factor pathway inhibitor (TFPI), Plasminogen, $\alpha_1$ -Proteinase Inhibitor, $\alpha_2$ -Macroglobulin                                                                       | ECs [4], SMCs [1] [2], Macrophages [13], T-lymphocytes [12], Neutrophils [14]                                   |
| <b>Stromelysins</b>                       |            |                                                                                                                                                                                                                                                                                                                                                                                                                                                                 |                                                                                                                                                                                                                                                                                                                                                                                                                                                                                                                                                                           |                                                                                                                 |
| Stromelysin-1                             | MMP-3      | Non triple helical regions of native Collagens (Type III, IV, V, VII, IX, X, and XI), Gelatin, Collagen Telopeptides, Elastin, Fibronectin, Vitronectin, Laminin, Entactin/ Nidogen-1, Tenascin, SPARC, Aggrecan, Decorin, Perlecan, Versican, Fibulin, Biglycan, Link Protein, Osteonectin, Myelin Basic Protein, Fibulin-2, Fibrin, Fibrinogen                                                                                                                | Pro-MMP-1, Pro-MMP-3, Pro-MMP-7, Pro-MMP-8, Pro-MMP-9, Pro-MMP-13, MCP-1, MCP-2, MCP-3, MCP-4, SDF, Pro-TNF- $\alpha$ , L-selectin, Pro-HB-EGF, Pro-IL-1 $\beta$ , Perlecan, Decorin, E-cadherin, IGFBP-3, Carboxymethylated transferrin (Cm-Tf), Substance P, T-kininogen, Casein, C1q, urokinase-type Plasminogen Activator (uPA), uPAR, Osteopontin, VEGFA, PAI (Plasminogen Activator Inhibitor)-1, Plasminogen, $\alpha_2$ -Antiplasmin, $\alpha_1$ -Proteinase Inhibitor, $\alpha_1$ -Anti-                                                                         | ECs [5], SMCs [2] and Lymphocytes [1] Macrophages [9]                                                           |

|                            |        |                                                                                                                                                                                                                                                                                            |                                                                                                                                                                                                                                                                                                                                                               |                                                                                           |
|----------------------------|--------|--------------------------------------------------------------------------------------------------------------------------------------------------------------------------------------------------------------------------------------------------------------------------------------------|---------------------------------------------------------------------------------------------------------------------------------------------------------------------------------------------------------------------------------------------------------------------------------------------------------------------------------------------------------------|-------------------------------------------------------------------------------------------|
| Stromelysin-2              | MMP-10 | Collagens (Type I, III, IV, and V), Gelatin, Elastin, Fibronectin, Aggrecan, Brevican Hyaluronan and Proteoglycan Link Protein 1, Proteoglycan, Link Protein, Fibrinogen                                                                                                                   | Chymotrypsin, $\alpha_2$ -Macroglobulin<br>Pro-MMP-1, Pro-MMP-7, Pro-MMP-8, Pro-MMP-9, Pro-MMP-10, Casein                                                                                                                                                                                                                                                     | ECs and Macrophages [15], SMCs [16]                                                       |
| Stromelysin-3              | MMP-11 | Gelatin, Fibronectin, Collagen Type IV, Laminin, Aggrecan                                                                                                                                                                                                                                  | Pro-MMP-11, IGFBP-1, Casein, Cm-Tf, $\alpha$ -actin-2, PAI-2, $\alpha_2$ -Antiplasmin, $\alpha_1$ -Proteinase Inhibitor, $\alpha_2$ -Macroglobulin                                                                                                                                                                                                            | ECs, SMCs, and Macrophages [2], Fibroblasts, B-cells [17]                                 |
| Stromelysin-4 or RASI-1    | MMP-19 | Native collagen Type IV, Gelatin, Laminin, Entactin/ Nidogen-1, Large Tenascin-C, Fibronectin, Aggrecan, Cartilage Oligomeric Matrix Protein (COMP), Fibrin, Fibrinogen                                                                                                                    | Pro-MMP-19, MMP-9, Casein, uPAR                                                                                                                                                                                                                                                                                                                               | Capillary EC and SMCs [18], Fibroblasts [19], PBMCs, TH1 lymphocytes [20], Monocytes [17] |
| <b>Matrilysins</b>         |        |                                                                                                                                                                                                                                                                                            |                                                                                                                                                                                                                                                                                                                                                               |                                                                                           |
| Matrilysin-1 or PUMP-1     | MMP-7  | Non helical segments of native collagen types IV, V, IX, X, XI, Gelatin, Elastin, Fibronectin, Vitronectin, Laminin, Entactin/ Nidogen-1, Tenascin, SPARC, Aggrecan, Brevican, Galectin-3, Link Protein, Decorin, Fibulin, Versican, Osteonectin, Myelin Basic Protein, Fibrin, Fibrinogen | Pro-MMP-1, Pro-MMP-2, Pro-MMP-7, Pro-MMP-9, Pro-TNF- $\alpha$ , Pro- $\alpha$ -defensin, Cell surface bound Fas-L, CXCL9, CXCL11, IGFBP-1, IGFBP-2, IGFBP-3, $\beta_4$ -integrin, E-cadherin, Apolipoprotein A1 (Apo-A1), Apo-CII, CD95-L, Casein, Cm-Tf, Osteopontin, uPA, Plasminogen, Decorin, $\alpha_1$ -Proteinase Inhibitor, $\alpha_2$ -Macroglobulin | ECs [21], Macrophages [22]                                                                |
| Matrilysin-2 or Endometase | MMP-26 | Native collagen Type IV, Gelatin, Fibronectin, Vitronectin, Fibrinogen                                                                                                                                                                                                                     | Pro-MMP-9, Pro-MMP26, IGFBP-1, $\alpha_1$ -Proteinase Inhibitor, $\alpha_2$ -Macroglobulin                                                                                                                                                                                                                                                                    | ECs [23], Fibroblasts, Macrophages and PMN [24, 25], B-cells [17]                         |
| <b>Membrane-anchored</b>   |        |                                                                                                                                                                                                                                                                                            |                                                                                                                                                                                                                                                                                                                                                               |                                                                                           |
| MT1-MMP                    | MMP-14 | Native collagens (Type I, II and III), Gelatin, Fibronectin, Tenascin, Vitronectin, Laminin, Entactin, Galectin-3, CTGF-L, Fibrillin, Aggrecan, Perlecan, Syndecan-1, Lumican, Myelin Basic Protein, Fibrinogen                                                                            | Pro-MMP-2, Pro-MMP-13, Pro-MMP-14, MMP-14, MCP-3, SDF, Cell-surface CD44, RANKL, Cell-surface tissue trans-glutaminase (tTG), Pro-TNF- $\alpha$ , IL-8, HB-EGF, Factor XII, Pro- $\alpha_v$ integrin chain, Apo-CII, Apo-E, $\alpha_1$ -Proteinase Inhibitor, $\alpha_2$ -Macroglobulin                                                                       | Vascular ECs [26], SMCs, Macrophage [27], Fibroblasts                                     |
| MT2-MMP                    | MMP-15 | Fibronectin, Tenascin, Entactin, Laminin, Aggrecan, Perlecan, Proteoglycan, Myelin Basic Protein                                                                                                                                                                                           | Pro-MMP-2, Cell-surface bound tTG, Pro-TNF- $\alpha$                                                                                                                                                                                                                                                                                                          | Fibroblasts, Leukocytes, T lymphocytes [17]                                               |
| MT3-MMP                    | MMP-16 | Collagen Type III, Gelatin, Fibronectin, Vitronectin, Laminin, Myelin Basic Protein                                                                                                                                                                                                        | Pro-MMP-2, Cell-surface bound tTG, Pro-TNF- $\alpha$ , Metastasis-suppressor KiSS-1                                                                                                                                                                                                                                                                           | ECs [28], Leukocytes, T- lymphocytes [17]                                                 |
| MT4-MMP                    | MMP-17 | Gelatin, Fibrin, Fibrinogen, Myelin Basic Protein                                                                                                                                                                                                                                          | Pro-MMP-2, Pro-TNF- $\alpha$ , HB-EGF, ADAMTS4 Peptidase                                                                                                                                                                                                                                                                                                      | ECs [28], Monocytes and B-Cells [17], Fibroblast                                          |
| MT5-MMP                    | MMP-24 | Fibronectin, Gelatin, Chondroitin Sulphate Proteoglycan, Dermatan Sulphate Proteoglycan.                                                                                                                                                                                                   | Pro-MMP-2, KiSS-1                                                                                                                                                                                                                                                                                                                                             | T-lymphocytes [17], Leukocytes                                                            |
| MT6-MMP or Leukolysin      | MMP-25 | Native collagen Type IV, Gelatin, Laminin-1, Fibronectin, Chondroitin Sulphate Proteoglycan, Dermatan Sulphate Proteoglycan, Myelin Basic Protein, Fibrin, Fibrinogen                                                                                                                      | Pro-MMP-2, Pro-MMP-9, uPAR<br>$\alpha_1$ -Proteinase Inhibitor                                                                                                                                                                                                                                                                                                | Monocytes [17], Leukocytes [29]                                                           |
| <b>Other MMPs</b>          |        |                                                                                                                                                                                                                                                                                            |                                                                                                                                                                                                                                                                                                                                                               |                                                                                           |

|                                          |        |                                                                                                                                                                                             |                                                                                                                               |                               |
|------------------------------------------|--------|---------------------------------------------------------------------------------------------------------------------------------------------------------------------------------------------|-------------------------------------------------------------------------------------------------------------------------------|-------------------------------|
| Macrophage Metalloelastase               | MMP-12 | Collagens (Type I, V, And IV), Gelatin, Elastin, Fibronectin, Vitronectin, Laminin, Entactin, Osteonectin, Decorin, Aggrecan, Biglycan, Fibrillin, Myelin Basic Protein, Fibrin, Fibrinogen | Plasminogen, Pro-TNF- $\alpha$ , ApoA-1, CXCL9, CXCL10, CXCL11, uPAR, vWF, Factor XII, TFPI, $\alpha_1$ -Proteinase Inhibitor | SMCs [30], Macrophage [9]     |
| Enamelysin                               | MMP-20 | Collagen XVIII, Amelogenin, Ameloblastin, Aggrecan, Laminin, COMP                                                                                                                           | Pro-MMP-20 (autolysis)                                                                                                        |                               |
| X-MMP (Xenopus)                          | MMP-21 | Gelatin, Aggrecan                                                                                                                                                                           | Casein                                                                                                                        | Fibroblasts, Macrophages [24] |
| C-MMP (Chicken)                          | MMP-22 | No matrix substrates defined                                                                                                                                                                |                                                                                                                               |                               |
| Cysteine Array MMP (CA-MMP) or Femalysin | MMP-23 | Gelatin, Casein, Fibronectin                                                                                                                                                                |                                                                                                                               |                               |
| CA-MMP (Gallus)                          | MMP-27 | Gelatin                                                                                                                                                                                     | Pro-MMP-27 (autolysis), Casein                                                                                                | B-cells [17]                  |
| Epilysin (CA-MMP)                        | MMP-28 | No matrix substrates defined                                                                                                                                                                | Casein                                                                                                                        | T-lymphocytes [17]            |

MMPs are categorized according to their substrate specificity. This extensive list of substrates represents both bona fide and potential substrate candidates. Modified from Sterlinc and Werb., 2001 [31]; Overall., 2002 [32], Visse and Nagase., 2003 [33], Nagase., 2006 [34] and *MEROPS* database (<http://merops.sanger.ac.uk>). VECs, Vascular Endothelial Cells; VSMCs, Vascular Smooth Muscle Cells;

**Supplement Table S2: Selective inhibitors for MMPs**

| <b>Inhibitor</b>                           | <b>MMP Number</b>              | <b>References</b>                                       |
|--------------------------------------------|--------------------------------|---------------------------------------------------------|
| ARP-100                                    | MMP-2                          | Chetty C et al., 2010 [35]                              |
| <i>cis</i> -9-Octadecenoyl-N-hydroxylamide | MMP-2                          | Wang Z et al., 2011 [36]                                |
| UK 370106                                  | MMP-3                          | Whitlock et al., 2007 [37]                              |
| AC10781F                                   | MMP-3                          | Johnson LL et al., 1999 [38]                            |
| CGS 27023A                                 | MMP-3                          | MacPherson LJ et al., 1997[39]                          |
| REGA-3G12 (mAb)                            | MMP-9                          | Martens E et al., 2007 [40]                             |
| AS111793                                   | MMP-12                         | Quément et al., 2008 [41]                               |
| MMP408                                     | MMP-12                         | Li W et al., 2009 [42]                                  |
| Compound 1                                 | MMP-13                         | Blagg JA et al., 2005 [43],<br>Shah M et al., 2012 [44] |
| Compound 2                                 | MMP-13                         | Johnson AR et al., 2007 [45]                            |
| Pyrimidine dicarboxamides                  | MMP-13                         | Engel CK et al., 2005 [46]                              |
| CL-82198                                   | MMP-13                         | Wu J et al., 2005 [47]                                  |
| Peptide G, PG                              | MT1-MMP                        | Suojanen J et al., 2009 [48]                            |
| DX-2400 (mAb)                              | MT1-MMP                        | Devy L et al., 2009 [49]                                |
| Piperazine 4u                              | MMP-9, MMP-13                  | Levin, JI et al. 2001 [50]                              |
| CRV and PPC Peptides                       | Pro-MMP-9                      | Suojanen J et al., 2011 [51]                            |
| <i>cis</i> -ACCP                           | MMP-2>MMP-9                    | Hoffman, A et al., 2008 [52]                            |
| CTT1, CTT2                                 | Gelatinases (MMP-2, MMP-9)     | Heikkilä P et al., 2006 [53]                            |
| N-sulfonylamino acid derivative            | Gelatinases (MMP-2, MMP-9)     | Tamura Y et al., 1998 [54]                              |
| SB-3CT                                     | Gelatinases (MMP-2, MMP-9)     | Kleifeld O et al., 2001 [55]                            |
| Chlorhexidine, Dihydrochloride             | Gelatinases MMP-2>MMP-9, MMP-8 | Gendron R et al., 1999 [56]                             |

Abbreviation: mAb - Monoclonal Antibody

1. Galis ZS, Sukhova GK, Lark MW, Libby P. Increased expression of matrix metalloproteinases and matrix degrading activity in vulnerable regions of human atherosclerotic plaques. *J Clin Invest* 1994; 94: 2493-2503.
2. Huang Y, Mironova M, Lopes-Virella MF. Oxidized LDL stimulates matrix metalloproteinase-1 expression in human vascular endothelial cells. *Arterioscler Thromb Vasc Biol* 1999; 19: 2640-2647.
3. Schonbeck U, Mach F, Sukhova GK, Atkinson E, Levesque E, Herman M, Graber P, Basset P, Libby P. Expression of stromelysin-3 in atherosclerotic lesions: regulation via CD40-CD40 ligand signaling in vitro and in vivo. *J Exp Med* 1999; 189: 843-853.
4. Genersch E, Hayess K, Neuenfeld Y, Haller H. Sustained ERK phosphorylation is necessary but not sufficient for MMP-9 regulation in endothelial cells: involvement of Ras-dependent and -independent pathways. *J Cell Sci* 2000; 113 Pt 23: 4319-4330.
5. Hanemaaijer R, Koolwijk P, le Clercq L, de Vree WJ, van Hinsbergh VW. Regulation of matrix metalloproteinase expression in human vein and microvascular endothelial cells. Effects of tumour necrosis factor alpha, interleukin 1 and phorbol ester. *Biochem J* 1993; 296 ( Pt 3): 803-809.
6. Herman MP, Sukhova GK, Libby P, Gerdes N, Tang N, Horton DB, Kilbride M, Breitbart RE, Chun M, Schonbeck U. Expression of neutrophil collagenase (matrix metalloproteinase-8) in human atheroma: a novel collagenolytic pathway suggested by transcriptional profiling. *Circulation* 2001; 104: 1899-1904.
7. Zaragoza C, Soria E, Lopez E, Browning D, Balbin M, Lopez-Otin C, Lamas S. Activation of the mitogen activated protein kinase extracellular signal-regulated kinase 1 and 2 by the nitric oxide-cGMP-cGMP-dependent protein kinase axis regulates the expression of matrix metalloproteinase 13 in vascular endothelial cells. *Mol Pharmacol* 2002; 62: 927-935.
8. Hattori Y, Nerusu KC, Bhagavathula N, Brennan M, Hattori N, Murphy HS, Su LD, Wang TS, Johnson TM, Varani J. Vascular expression of matrix metalloproteinase-13 (collagenase-3) in basal cell carcinoma. *Exp Mol Pathol* 2003; 74: 230-237.
9. Carmeliet P, Moons L, Lijnen R, Baes M, Lemaitre V, Tipping P, Drew A, Eeckhout Y, Shapiro S, Lupu F, Collen D. Urokinase-generated plasmin activates matrix metalloproteinases during aneurysm formation. *Nat Genet* 1997; 17: 439-444.
10. Frisdal E, Gest V, Vieillard-Baron A, Levame M, Lepetit H, Eddahibi S, Lafuma C, Harf A, Adnot S, Dortho MP. Gelatinase expression in pulmonary arteries during experimental pulmonary hypertension. *Eur Respir J* 2001; 18: 838-845.
11. Shah PK, Falk E, Badimon JJ, Fernandez-Ortiz A, Mailhac A, Villareal-Levy G, Fallon JT, Regnstrom J, Fuster V. Human monocyte-derived macrophages induce collagen breakdown in fibrous caps of atherosclerotic plaques. Potential role of matrix-degrading metalloproteinases and implications for plaque rupture. *Circulation* 1995; 92: 1565-1569.
12. Leppert D, Hauser SL, Kishiyama JL, An S, Zeng L, Goetzl EJ. Stimulation of matrix metalloproteinase-dependent migration of T cells by eicosanoids. *FASEB J* 1995; 9: 1473-1481.
13. Xu XP, Meisel SR, Ong JM, Kaul S, Cercek B, Rajavashisth TB, Sharifi B, Shah PK. Oxidized low-density lipoprotein regulates matrix metalloproteinase-9 and its tissue inhibitor in human monocyte-derived macrophages. *Circulation* 1999; 99: 993-998.
14. Lin TC, Li CY, Tsai CS, Ku CH, Wu CT, Wong CS, Ho ST. Neutrophil-mediated secretion and activation of matrix metalloproteinase-9 during cardiac surgery with cardiopulmonary bypass. *Anesth Analg* 2005; 100: 1554-1560.
15. Montero I, Orbe J, Varo N, Belouqui O, Monreal JJ, Rodriguez JA, Diez J, Libby P, Paramo JA. C-reactive protein induces matrix metalloproteinase-1 and -10 in human

endothelial cells: implications for clinical and subclinical atherosclerosis. *J Am Coll Cardiol* 2006; 47: 1369-1378.

16. Wu L, Chien WM, Hartman ME, Moussavi-Harami F, Liu Y, Chin MT. Regulation of MMP10 expression by the transcription factor CHF1/Hey2 is mediated by multiple E boxes. *Biochem Biophys Res Commun* 2011; 415: 662-668.

17. Bar-Or A, Nuttall RK, Duddy M, Alter A, Kim HJ, Ifergan I, Pennington CJ, Bourgoin P, Edwards DR, Yong VW. Analyses of all matrix metalloproteinase members in leukocytes emphasize monocytes as major inflammatory mediators in multiple sclerosis. *Brain* 2003; 126: 2738-2749.

18. Kolb C, Mauch S, Krawinkel U, Sedlacek R. Matrix metalloproteinase-19 in capillary endothelial cells: expression in acutely, but not in chronically, inflamed synovium. *Exp Cell Res* 1999; 250: 122-130.

19. Hieta N, Impola U, Lopez-Otin C, Saarialho-Kere U, Kahari VM. Matrix metalloproteinase-19 expression in dermal wounds and by fibroblasts in culture. *J Invest Dermatol* 2003; 121: 997-1004.

20. Sedlacek R, Mauch S, Kolb B, Schatzlein C, Eibel H, Peter HH, Schmitt J, Krawinkel U. Matrix metalloproteinase MMP-19 (RASI-1) is expressed on the surface of activated peripheral blood mononuclear cells and is detected as an autoantigen in rheumatoid arthritis. *Immunobiology* 1998; 198: 408-423.

21. Holnthoner W, Kerenyi M, Groger M, Kratochvill F, Petzelbauer P. Regulation of matrilysin expression in endothelium by fibroblast growth factor-2. *Biochem Biophys Res Commun* 2006; 342: 725-733.

22. Filippov S, Caras I, Murray R, Matrisian LM, Chapman HA, Jr., Shapiro S, Weiss SJ. Matrilysin-dependent elastolysis by human macrophages. *J Exp Med* 2003; 198: 925-935.

23. Tunuguntla R, Ripley D, Sang QX, Chegini N. Expression of matrix metalloproteinase-26 and tissue inhibitors of metalloproteinases TIMP-3 and -4 in benign endometrium and endometrial cancer. *Gynecol Oncol* 2003; 89: 453-459.

24. Skoog T, Ahokas K, Orsmark C, Jeskanen L, Isaka K, Saarialho-Kere U. MMP-21 is expressed by macrophages and fibroblasts in vivo and in culture. *Exp Dermatol* 2006; 15: 775-783.

25. Li W, Savinov AY, Rozanov DV, Golubkov VS, Hedayat H, Postnova TI, Golubkova NV, Linli Y, Krajewski S, Strongin AY. Matrix metalloproteinase-26 is associated with estrogen-dependent malignancies and targets alpha1-antitrypsin serpin. *Cancer research* 2004; 64: 8657-8665.

26. Rajavashisth TB, Liao JK, Galis ZS, Tripathi S, Laufs U, Tripathi J, Chai NN, Xu XP, Jovinge S, Shah PK, Libby P. Inflammatory cytokines and oxidized low density lipoproteins increase endothelial cell expression of membrane type 1-matrix metalloproteinase. *The Journal of biological chemistry* 1999; 274: 11924-11929.

27. Rajavashisth TB, Xu XP, Jovinge S, Meisel S, Xu XO, Chai NN, Fishbein MC, Kaul S, Cercek B, Sharifi B, Shah PK. Membrane type 1 matrix metalloproteinase expression in human atherosclerotic plaques: evidence for activation by proinflammatory mediators. *Circulation* 1999; 99: 3103-3109.

28. Plaisier M, Kapiteijn K, Koolwijk P, Fijten C, Hanemaaijer R, Grimbergen JM, Mulder-Stapel A, Quax PH, Helmerhorst FM, van Hinsbergh VW. Involvement of membrane-type matrix metalloproteinases (MT-MMPs) in capillary tube formation by human endometrial microvascular endothelial cells: role of MT3-MMP. *J Clin Endocrinol Metab* 2004; 89: 5828-5836.

29. Pei D. Leukolysin/MMP25/MT6-MMP: a novel matrix metalloproteinase specifically expressed in the leukocyte lineage. *Cell Res* 1999; 9: 291-303.

30. Wu L, Tanimoto A, Murata Y, Sasaguri T, Fan J, Sasaguri Y, Watanabe T. Matrix metalloproteinase-12 gene expression in human vascular smooth muscle cells. *Genes Cells* 2003; 8: 225-234.
31. Sternlicht MD, Werb Z. How matrix metalloproteinases regulate cell behavior. *Annu Rev Cell Dev Biol* 2001; 17: 463-516.
32. Overall CM. Molecular determinants of metalloproteinase substrate specificity: matrix metalloproteinase substrate binding domains, modules, and exosites. *Mol Biotechnol* 2002; 22: 51-86.
33. Visse R, Nagase H. Matrix metalloproteinases and tissue inhibitors of metalloproteinases: structure, function, and biochemistry. *Circ Res* 2003; 92: 827-839.
34. Nagase H, Visse R, Murphy G. Structure and function of matrix metalloproteinases and TIMPs. *Cardiovasc Res* 2006; 69: 562-573.
35. Chetty C, Lakka SS, Bhoopathi P, Rao JS. MMP-2 alters VEGF expression via alphaVbeta3 integrin-mediated PI3K/AKT signaling in A549 lung cancer cells. *International journal of cancer Journal international du cancer* 2010; 127: 1081-1095.
36. Wang Z, Kong L, Kang J, Vaughn DM, Bush GD, Walding AL, Grigorian AA, Robinson JS, Jr., Nakayama DK. Interleukin-1beta induces migration of rat arterial smooth muscle cells through a mechanism involving increased matrix metalloproteinase-2 activity. *The Journal of surgical research* 2011; 169: 328-336.
37. Whitlock GA, Dack KN, Dickinson RP, Lewis ML. A novel series of highly selective inhibitors of MMP-3. *Bioorganic & medicinal chemistry letters* 2007; 17: 6750-6753.
38. Johnson LL, Bornemeier DA, Janowicz JA, Chen J, Pavlovsky AG, Ortwine DF. Effect of species differences on stromelysin-1 (MMP-3) inhibitor potency. An explanation of inhibitor selectivity using homology modeling and chimeric proteins. *The Journal of biological chemistry* 1999; 274: 24881-24887.
39. MacPherson LJ, Bayburt EK, Capparelli MP, Carroll BJ, Goldstein R, Justice MR, Zhu L, Hu S, Melton RA, Fryer L, Goldberg RL, Doughty JR, Spirito S, Blancuzzi V, Wilson D, O'Byrne EM, Ganu V, Parker DT. Discovery of CGS 27023A, a non-peptidic, potent, and orally active stromelysin inhibitor that blocks cartilage degradation in rabbits. *Journal of medicinal chemistry* 1997; 40: 2525-2532.
40. Martens E, Leyssen A, Van Aelst I, Fiten P, Piccard H, Hu J, Descamps FJ, Van den Steen PE, Proost P, Van Damme J, Liuzzi GM, Riccio P, Polverini E, Opdenakker G. A monoclonal antibody inhibits gelatinase B/MMP-9 by selective binding to part of the catalytic domain and not to the fibronectin or zinc binding domains. *Biochimica et biophysica acta* 2007; 1770: 178-186.
41. Le Qument C, Guenon I, Gillon JY, Valenca S, Cayron-Elizondo V, Lagente V, Boichot E. The selective MMP-12 inhibitor, AS111793 reduces airway inflammation in mice exposed to cigarette smoke. *British journal of pharmacology* 2008; 154: 1206-1215.
42. Li W, Li J, Wu Y, Wu J, Hotchandani R, Cunningham K, McFadyen I, Bard J, Morgan P, Schlerman F, Xu X, Tam S, Goldman SJ, Williams C, Sypek J, Mansour TS. A selective matrix metalloprotease 12 inhibitor for potential treatment of chronic obstructive pulmonary disease (COPD): discovery of (S)-2-(8-(methoxycarbonylamino)dibenzo[b,d]furan-3-sulfonamido)-3-methylbutanoic acid (MMP408). *Journal of medicinal chemistry* 2009; 52: 1799-1802.
43. Blagg JA, Noe MC, Wolf-Gouveia LA, Reiter LA, Laird ER, Chang SP, Danley DE, Downs JT, Elliott NC, Eskra JD, Griffiths RJ, Hardink JR, Haugeto AI, Jones CS, Liras JL, Lopresti-Morrow LL, Mitchell PG, Pandit J, Robinson RP, Subramanyam C, Vaughn-Bowser ML, Yocum SA. Potent pyrimidinetrione-based inhibitors of MMP-13 with enhanced selectivity over MMP-14. *Bioorganic & medicinal chemistry letters* 2005; 15: 1807-1810.
44. Shah M, Huang D, Blick T, Connor A, Reiter LA, Hardink JR, Lynch CC, Waltham M, Thompson EW. An MMP13-selective inhibitor delays primary tumor growth and the onset

of tumor-associated osteolytic lesions in experimental models of breast cancer. *PloS one* 2012; 7: e29615.

45. Johnson AR, Pavlovsky AG, Ortwine DF, Prior F, Man CF, Bornemeier DA, Banotai CA, Mueller WT, McConnell P, Yan C, Baragi V, Lesch C, Roark WH, Wilson M, Datta K, Guzman R, Han HK, Dyer RD. Discovery and characterization of a novel inhibitor of matrix metalloproteinase-13 that reduces cartilage damage in vivo without joint fibroplasia side effects. *The Journal of biological chemistry* 2007; 282: 27781-27791.

46. Engel CK, Pirard B, Schimanski S, Kirsch R, Habermann J, Klingler O, Schlotte V, Weithmann KU, Wendt KU. Structural basis for the highly selective inhibition of MMP-13. *Chemistry & biology* 2005; 12: 181-189.

47. Wu J, Rush TS, 3rd, Hotchandani R, Du X, Geck M, Collins E, Xu ZB, Skotnicki J, Levin JI, Lovering FE. Identification of potent and selective MMP-13 inhibitors. *Bioorganic & medicinal chemistry letters* 2005; 15: 4105-4109.

48. Suojanen J, Salo T, Koivunen E, Sorsa T, Pirila E. A novel and selective membrane type-1 matrix metalloproteinase (MT1-MMP) inhibitor reduces cancer cell motility and tumor growth. *Cancer biology & therapy* 2009; 8: 2362-2370.

49. Devy L, Huang L, Naa L, Yanamandra N, Pieters H, Frans N, Chang E, Tao Q, Vanhove M, Lejeune A, van Gool R, Sexton DJ, Kuang G, Rank D, Hogan S, Pazmany C, Ma YL, Schoonbroodt S, Nixon AE, Ladner RC, Hoet R, Henderikx P, Tenhoor C, Rabbani SA, Valentino ML, Wood CR, Dransfield DT. Selective inhibition of matrix metalloproteinase-14 blocks tumor growth, invasion, and angiogenesis. *Cancer research* 2009; 69: 1517-1526.

50. Levin JI, Chen JM, Du MT, Nelson FC, Wehr T, DiJoseph JF, Killar LM, Skala S, Sung A, Sharr MA, Roth CE, Jin G, Cowling R, Di L, Sherman M, Xu ZB, March CJ, Mohler KM, Black RA, Skotnicki JS. The discovery of anthranilic acid-based MMP inhibitors. Part 3: incorporation of basic amines. *Bioorganic & medicinal chemistry letters* 2001; 11: 2975-2978.

51. Suojanen J, Vilen ST, Nyberg P, Heikkila P, Penate-Medina O, Saris PE, Hagstrom J, Ranta TM, Salo T, Sorsa T, Reunanen J. Selective gelatinase inhibitor peptide is effective in targeting tongue carcinoma cell tumors in vivo. *Anticancer research* 2011; 31: 3659-3664.

52. Hoffman A, Qadri B, Frant J, Katz Y, Bhusare SR, Breuer E, Hadar R, Reich R. Carbamoylphosphonate matrix metalloproteinase inhibitors 6: cis-2-aminocyclohexylcarbamoylphosphonic acid, a novel orally active antimetastatic matrix metalloproteinase-2 selective inhibitor--synthesis and pharmacodynamic and pharmacokinetic analysis. *Journal of medicinal chemistry* 2008; 51: 1406-1414.

53. Heikkila P, Suojanen J, Pirila E, Vaananen A, Koivunen E, Sorsa T, Salo T. Human tongue carcinoma growth is inhibited by selective antigelatinolytic peptides. *International journal of cancer Journal international du cancer* 2006; 118: 2202-2209.

54. Tamura Y, Watanabe F, Nakatani T, Yasui K, Fuji M, Komurasaki T, Tsuzuki H, Maekawa R, Yoshioka T, Kawada K, Sugita K, Ohtani M. Highly selective and orally active inhibitors of type IV collagenase (MMP-9 and MMP-2): N-sulfonylamino acid derivatives. *Journal of medicinal chemistry* 1998; 41: 640-649.

55. Kleifeld O, Kotra LP, Gervasi DC, Brown S, Bernardo MM, Fridman R, Mobashery S, Sagi I. X-ray absorption studies of human matrix metalloproteinase-2 (MMP-2) bound to a highly selective mechanism-based inhibitor. comparison with the latent and active forms of the enzyme. *The Journal of biological chemistry* 2001; 276: 17125-17131.

56. Gendron R, Grenier D, Sorsa T, Mayrand D. Inhibition of the activities of matrix metalloproteinases 2, 8, and 9 by chlorhexidine. *Clinical and diagnostic laboratory immunology* 1999; 6: 437-439.
